# Supplementary material for: LncRNA ZNF593-AS alleviates diabetic cardiomyopathy via suppressing IRF3 signaling pathway
Source: PubMed Central journal article supplement — Mol Ther Nucleic Acids. 2023 May 5;32:689–703. doi: 10.1016/j.omtn.2023.04.025 (PMC10199406; doi:10.1016/j.omtn.2023.04.025), 2023-05-05
Supplement: mmc1.pdf [file mmc1.pdf]

**OMTN, Volume 32**

**Supplemental information**

**LncRNA ZNF593-AS alleviates diabetic  
cardiomyopathy via suppressing  
IRF3 signaling pathway**

**Rong Xie, Jiahui Fan, Jianpei Wen, Kunying Jin, Jiabing Zhan, Shuai Yuan, Yuyan Tang, Xiang Nie, Zheng Wen, Huaping Li, Chen Chen, and Dao Wen Wang**

## Supplemental Material

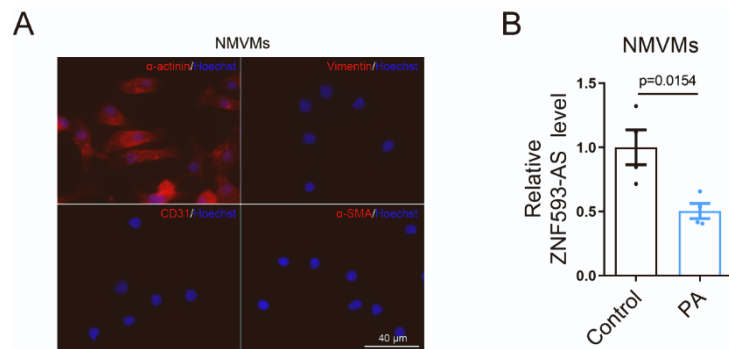

**Figure S1. PA reduced ZNF593-AS level in NMVMs.** (A) The purity of NMVMs indicated by immunofluorescence. (B) RT-qPCR analysis of ZNF593-AS levels in NMVMs under the stimulation of PA. Student's *t*-test was used for comparisons in (B).

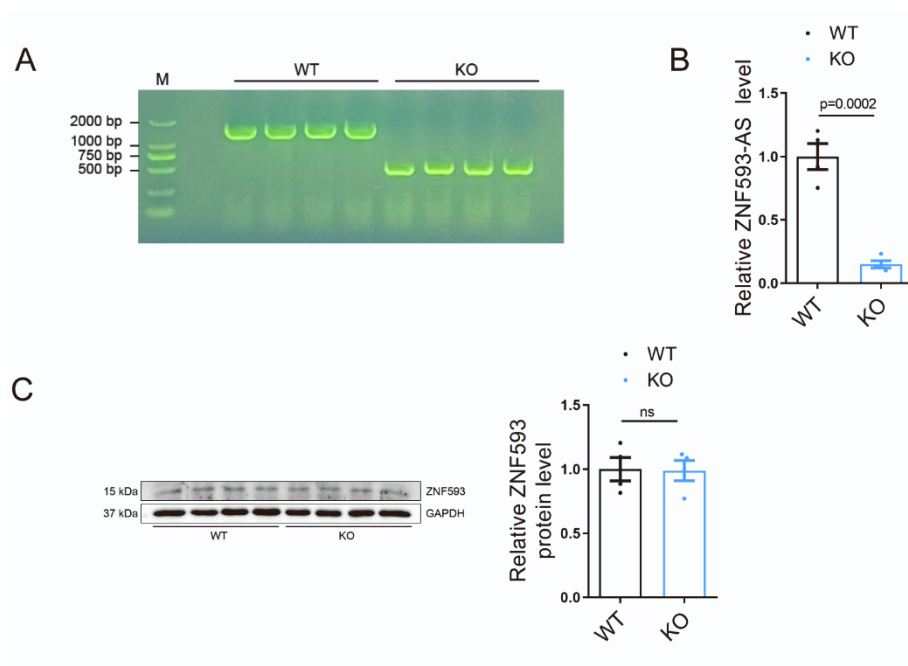

**Figure S2. Genotyping of ZNF593-AS KO mice.** (A) Genotyping of ZNF593-AS KO mice. (B) RT-qPCR analysis of ZNF-593-AS levels in ZNF593-AS KO mice hearts. (C) Western blotting analysis of ZNF593 protein levels in ZNF593-AS KO mice hearts. Student's *t*-test was used for comparisons in (B) and (C).

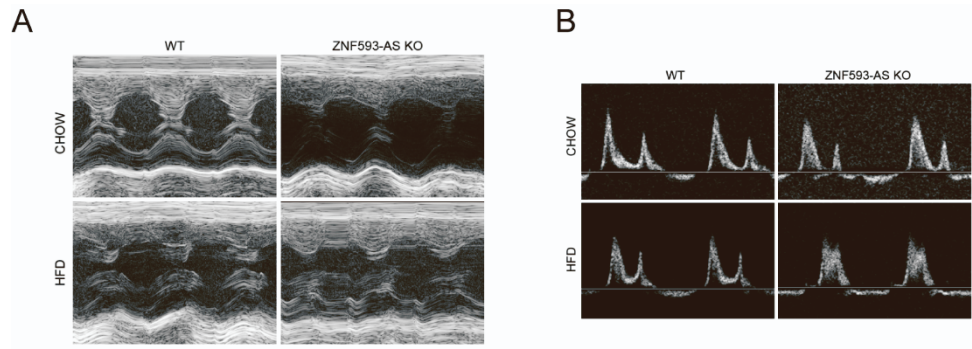

**Figure S3. Representative images for M-mode and mitral valve flow of ZNF593-AS KO mice.** (A) Representative images for M-mode of ZNF593-AS KO mice. (B) Representative images for mitral valve flow of ZNF593-AS KO mice.

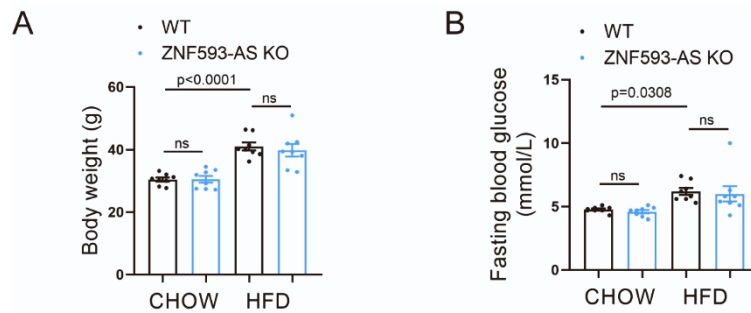

**Figure S4. Body weight and fasting blood glucose were unaffected by ZNF593-AS deletion.** (A and B) Body weight (A) and fasting blood glucose (B) of ZNF593-AS KO and WT mice fed with high-fat or normal diet. One-way ANOVA with the Tukey post-test was used (A) and (B).

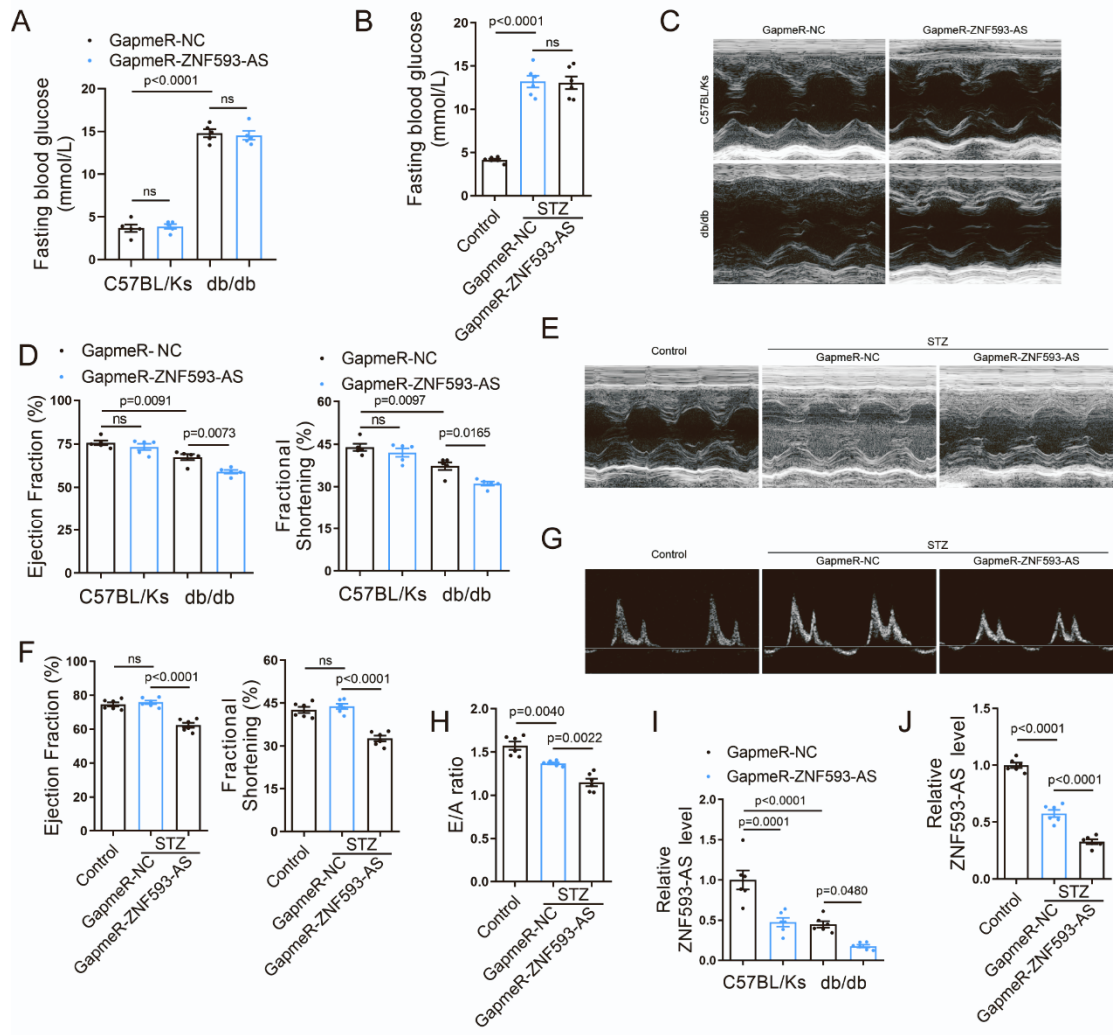

**Figure S5. ZNF593-AS knockdown aggravated cardiac dysfunction in db/db and STZ-induced diabetic mice.** (A) Fasting blood glucose of db/db and C57BL/Ks mice. (B) Fasting blood glucose of STZ-induced diabetic and control mice. (C) Representative images for M-mode of db/db and C57BL/Ks mice. (D) EF value and FS value of db/db mice and C57BL/Ks mice. (E) Representative images for M-mode of STZ-induced diabetic and control mice. (F) EF value and FS value of STZ-induced diabetic and control mice. (G) Representative images for mitral valve flow of STZ-induced diabetic and control mice. (H) E/A ratio of STZ-induced diabetic and control mice. (I) RT-qPCR analysis of the efficiency of ZNF593-AS knockdown in db/db mice hearts. (J) RT-qPCR analysis of the efficiency of ZNF593-AS knockdown in STZ-induced diabetic mice hearts. One-way ANOVA with the Tukey post-test was used (A), (B), (D), (F), (H), (I), and (J).

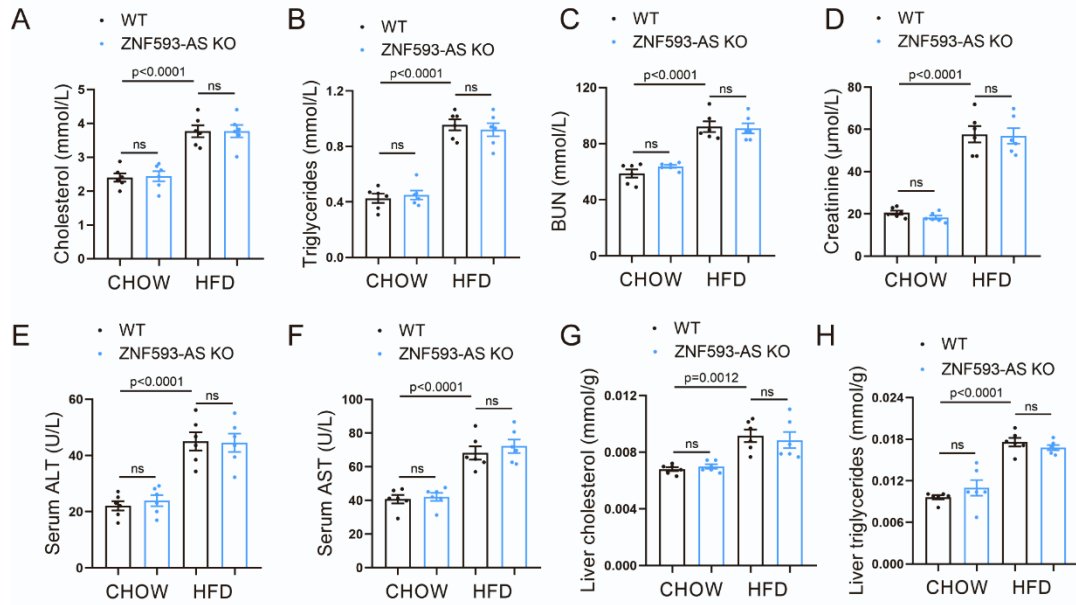

**Figure S6. Serum biochemicals and hepatic metabolic parameters of ZNF593-KO mice.** (A, B, C, D, E, and F) Circulating levels of cholesterol (A), triglycerides (B), urea nitrogen (BUN)(C), creatinine (D), alanine aminotransferase (ALT)(E), and aspartate aminotransferase (AST)(F) of ZNF593-AS KO mice. (G and H) Hepatic levels of cholesterol (G) and triglycerides (H) of ZNF593-AS KO mice. One-way ANOVA with the Tukey post-test was used (A), (B), (C), (D), (E), (F), (G), and (H).

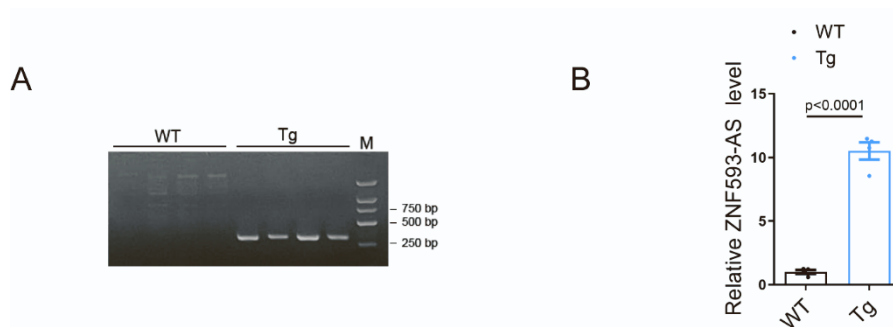

**Figure S7. Genotyping of ZNF593-AS Tg mice.** (A) Genotyping of ZNF593-AS Tg mice. (B) RT-qPCR analysis of ZNF593-AS levels in ZNF593-AS Tg mice hearts. Student's *t*-test was used for comparisons in (B).

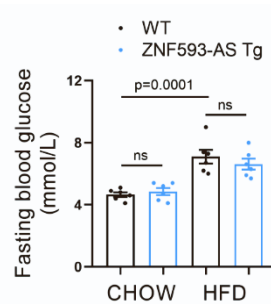

**Figure S8. Fasting blood glucose of ZNF593-Tg mice.** One-way ANOVA with the Tukey post-test was used for comparisons.

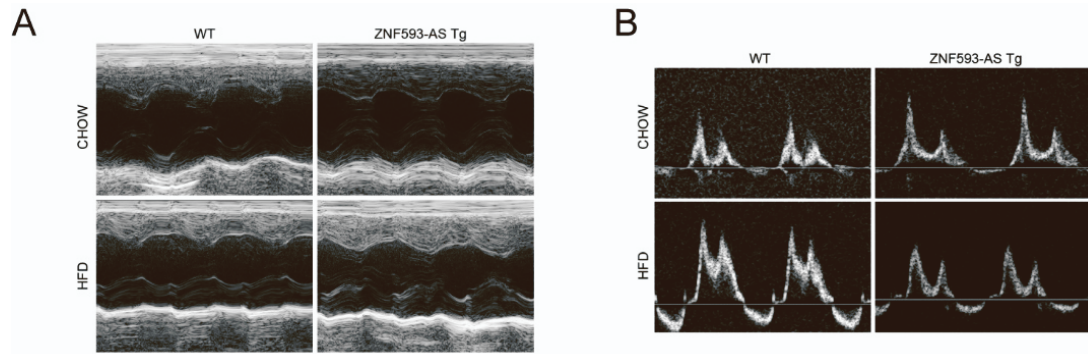

**Figure S9.** Representative images for M-mode and mitral valve flow of ZNF593-AS Tg mice. (A) Representative images for M-mode of ZNF593-AS Tg mice. (B) Representative images for mitral valve flow of ZNF593-AS Tg mice.

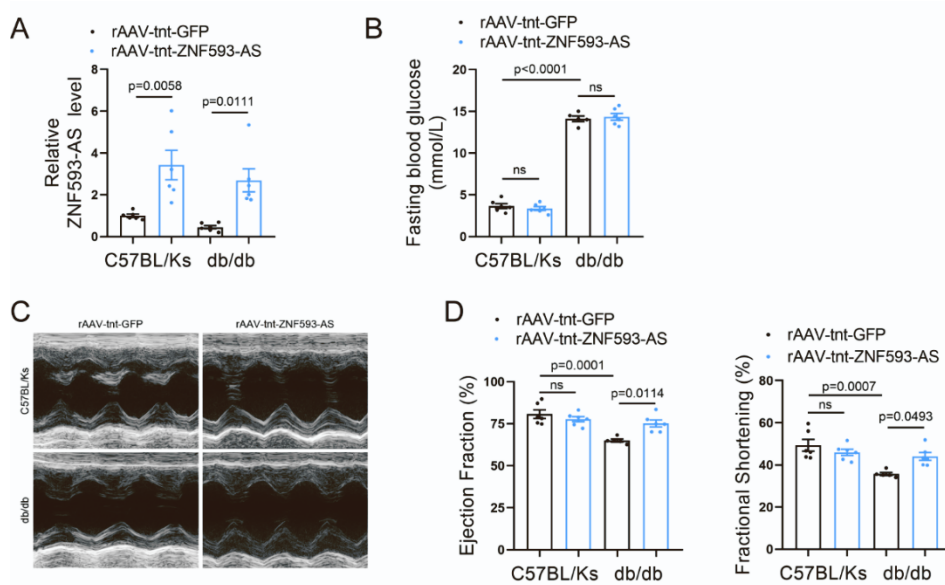

**Figure S10.** ZNF593-AS overexpression attenuated cardiac dysfunction in db/db mice. (A) RT-qPCR analysis of the efficiency of ZNF593-AS overexpression in the hearts of db/db and C57BL/Ks mice injected with rAAV9-tnt-ZNF593-AS or rAAV9-tnt-GFP. (B) Fasting blood glucose levels of db/db and C57BL/Ks mice. (C) Representative images for M-mode of db/db and C57BL/Ks mice. (D) EF value and FS value of db/db mice and C57BL/Ks mice. One-way ANOVA with the Tukey post-test was used in (A), (B) and (D).

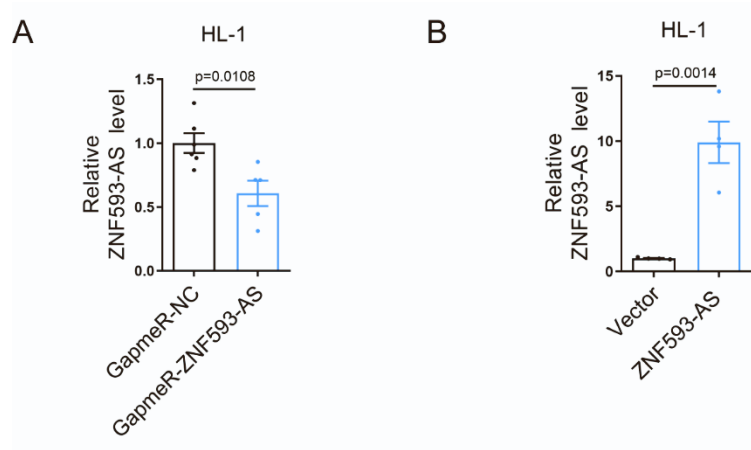

**Figure S11. The efficiency of knockdown and overexpression of ZNF593-AS in vitro.** (A) RT-qPCR analysis of the efficiency of ZNF593-AS knockdown in HL-1 cells. (B) RT-qPCR analysis of the efficiency of ZNF593-AS overexpression in HL-1 cells. Student's *t*-test was used for comparisons in (A) and (B).

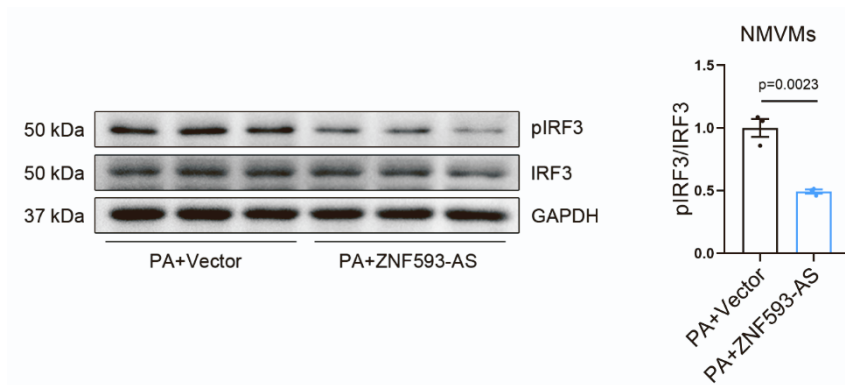

**Figure S12. ZNF593-AS overexpression suppressed IRF3 phosphorylation in NMVMs.** Student's *t*-test was used for comparisons.

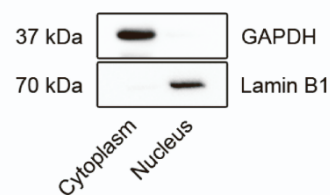

**Figure S13. Determination of the purity of nuclear and cytoplasmic fractions.** Western blotting analysis to determine the purity of nuclear and cytoplasmic fractions.

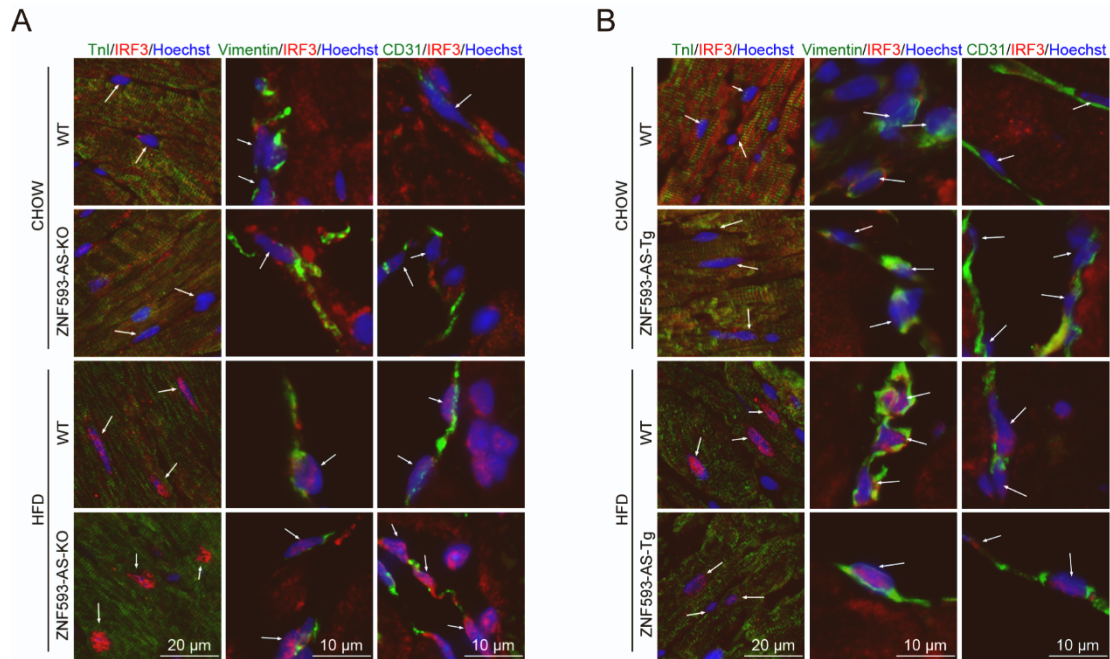

**Figure S14. Co-staining IRF3 with different cardiac cell markers.** (A and B) Co-staining IRF3 with different cardiac cell markers in ZNF593-AS KO (A) and ZNF593-Tg (B) mice heart.

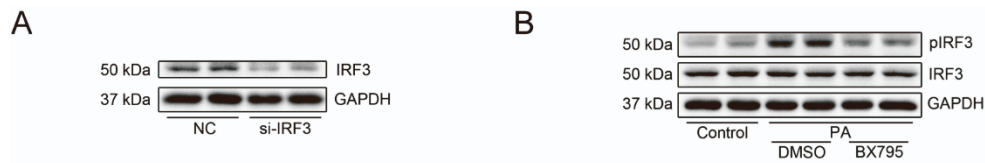

**Figure S15. Inhibition of IRF3 signaling via knocking down IRF3 and suppressing IRF3 phosphorylation.** (A) Western blotting analysis of the efficiency of IRF3 knockdown in HL-1 cells. (B) Western blotting analysis of phosphorylated and total IRF3 of BX795 treated HL-1 cells in the presence of PA.

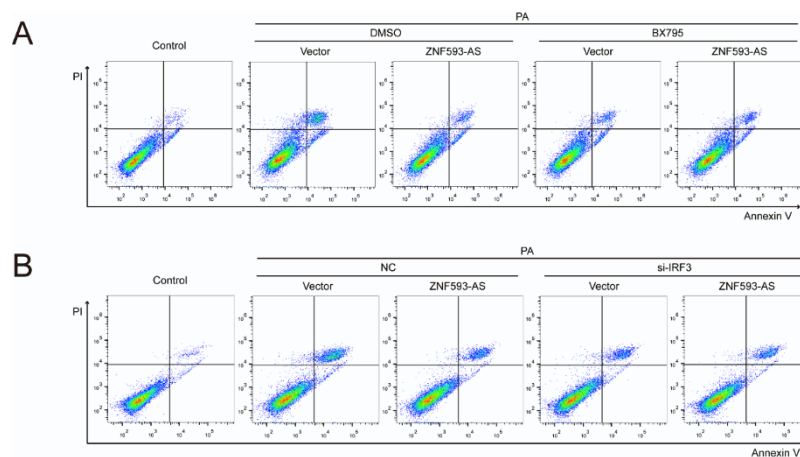

**Figure S16. Representative flow cytometry dot plots for apoptosis analysis.** (A and B) Representative flow cytometry dot plots for apoptosis analysis under BX795 treatment (A) and IRF3 knockdown (B).



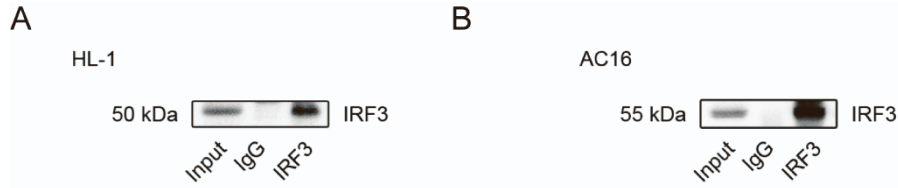

**Figure S17. The efficiency of IRF3 antibody to enrich IRF3 protein.** (A and B) Western blotting analysis to validate the efficiency of IRF3 antibody to enrich IRF3 in HL-1 cells (A) and AC16 cells (B).

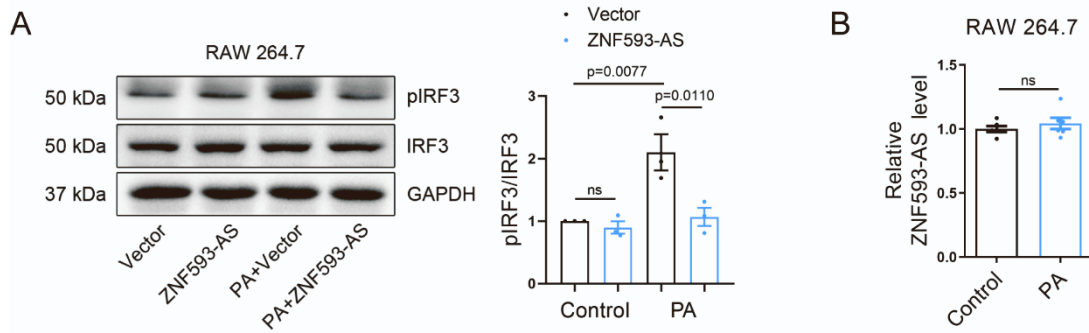

**Figure S18. ZNF593-AS/IRF3 pathway in macrophage.** (A) ZNF593-AS suppressed PA-induced IRF3 phosphorylation in RAW 264.7 cells. (B) RT-qPCR analysis of ZNF593-AS levels in RAW 264.7 under the stimulation of PA. One-way ANOVA with the Tukey post-test was used for comparisons in (A). Student's *t*-test was used in (B).

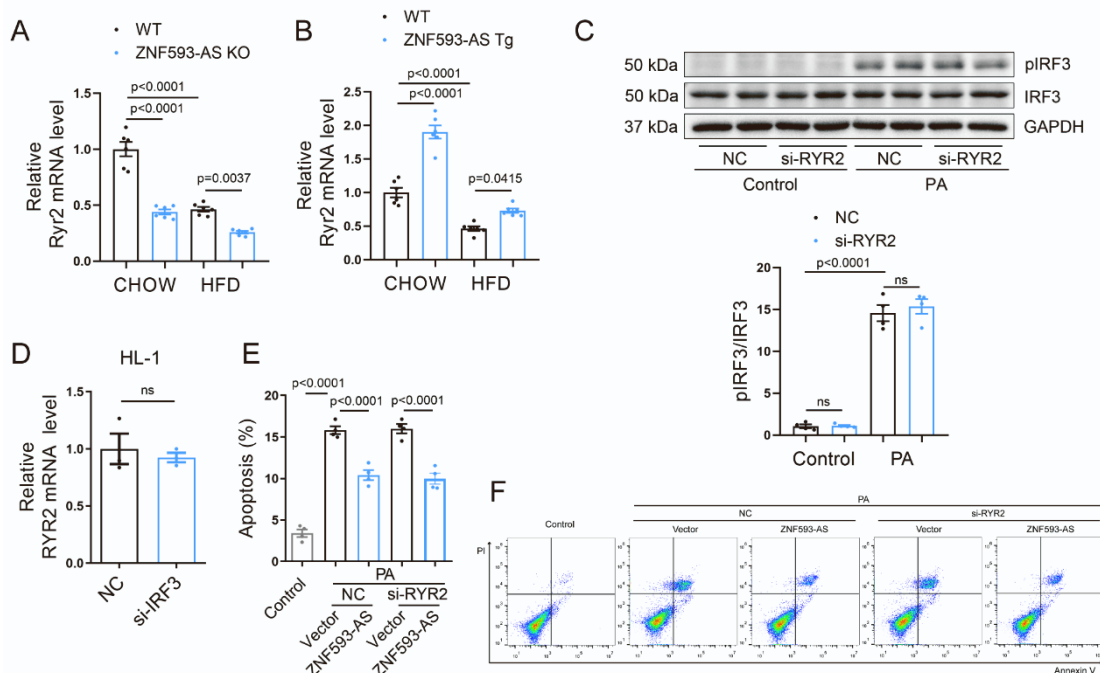

**Figure S19. ZNF593-AS/RYR2 pathway in diabetic cardiomyopathy.** (A) RT-qPCR analysis of RYR2 mRNA levels in ZNF593-AS KO mice hearts. (B) RT-qPCR analysis of RYR2 mRNA levels in ZNF593-AS Tg mice hearts. (C) RYR2 was unable to affect IRF3 phosphorylation. (D) IRF3 was unable to affect RYR2 expression. (E) RYR2 knockdown failed to diminish the anti-apoptotic effect of ZNF593-AS. (F) Representative flow cytometry dot plots for apoptosis analysis. One-way ANOVA with the Tukey post-test was used for comparisons in (A), (B), (C), and (E). Student's *t*-test was used in (D).

**Table S1. Clinical characteristics of patients with chronic heart failure.**

| Patient | Gender | Age (years) | LVEF (%) | Diabetes mellitus |
|---------|--------|-------------|----------|-------------------|
| 1       | Male   | 62          | 37       | No                |
| 2       | Male   | 53          | 26       | No                |
| 3       | Male   | 47          | 30       | No                |
| 4       | Male   | 50          | 22       | Yes               |
| 5       | Male   | 68          | 31       | Yes               |
| 6       | Male   | 60          | 26       | Yes               |
| 7       | Male   | 66          | 22       | Yes               |
| 8       | Male   | 59          | 27       | Yes               |

**Table S2. List of PCR primers.**

| Primers     | Forward 5'-3'           | Reverse 5'-3'           |
|-------------|-------------------------|-------------------------|
| h-ZNF593-AS | TGAGCACCCATCCATCAATCC   | CCCAGGCAGCGCAGAGTCTT    |
| m-ZNF593-AS | GGCTCCTGCTATGCAGTATGGA  | TGGAGGGGTCAGTAGAGGACTG  |
| m-Ifnb1     | GATTGACGTGGGAGATGTCCTC  | TCCTGAAGATCTCTGCTCGGAC  |
| m-Cxcl10    | GTGCTGCCGTCATTTTCTGC    | TCCGGATTCAGACATCTCTGC   |
| m-Ccl2      | GCATCTGCCCTAAGGTCTTCAG  | ACTGTACACTGGTCACTCCT    |
| m-Ccl5      | CTCACCATATGGCTCGGACAC   | TGGCGGTTTCCTTCGAGTGAC   |
| m-Ifit1     | AGCAGAAGCACACATTGAAGAAG | TGCCAATTCTTGCACATTGTCCT |
| m-Oasl2     | GCAAGCCTTTCACCATCGAC    | TGAGTATGATGGTGTCCGAGTC  |
| m-Isg15     | GACGCAGACTGTAGACACGC    | GCGCAAATGCTTGATCACTGT   |
| m-Rsad2     | AGAGGTGTCCTGTTTGGTGC    | AGCTTCAGGTCAGCTTACTCCA  |
| m-Gapdh     | GACCTCATGGCCTACATGGC    | ATTATGGGGGTCTGGGATGGA   |
| h-GAPDH     | GACCCCTTCATTGACCTCAAC   | CTTCTCCATGGTGGTGAAGA    |
| 18S rRNA    | GTAACCCGTTGAACCCATT     | CCATCCAATCGGTAGTAGCG    |
| m-Ryr2      | CCTGCAAATGTGGAGGATGTCTG | CCACCTTGACATGTAGCTGCA   |
